# Supplementary material for: Synthesis and electrochromic properties of polyamines containing a 4,4′-diaminotriphenylamine-N,N′-diyl unit in the polymer backbone: Ru-catalyzed N–H insertion polycondensation of 1,4-phenylenebis(diazoacetate) with 4,4′-diaminotriphenylamine derivatives
Source: Royal Society of Chemistry journal article supplement (doi:10.1039/d2py01118b), 2022-01-01
Supplement: d2py01118b1.pdf [file d2py01118b1.pdf]

*Supplementary Information for*

**Synthesis and electrochromic property of polyamines containing 4,4'-  
diaminotriphenylamine-*N,N'*-diyl unit in the polymer backbone: Ru-catalyzed N–H  
insertion polycondensation of 1,4-phenylenebis(diazoacetate) with 4,4'-  
diaminotriphenylamine derivatives**

Yun-Chi Wang, Yu-Jen Shao, Guey-Sheng Liou,\* Sota Nagao, Yusuke Makino, Eita Akiyama, Masaaki  
Kato, Hiroaki Shimomoto,\* and Eiji Ihara\*

Institute of Polymer Science and Engineering, National Taiwan University, Taipei 10617, Taiwan  
orcid.org/0000-0003-3725-3768; Phone: +886-2-33665070; Email: gsliou@ntu.edu.tw (G.-S. L.)

Department of Materials Science and Biotechnology, Graduate School of Science and Engineering, Ehime  
University, 3 Bunkyo-cho, Matsuyama 790-8577, Japan  
orcid.org/ 0000-0002-9515-8681; Phone & Fax: +81-89-927-9949; e-mail: shimomoto.hiroaki.mx@ehime-  
u.ac.jp (H. S.)  
orcid.org/0000-0002-0279-5105; Phone & Fax: +81-89-927-8547; e-mail: ihara@ehime-u.ac.jp (E. I.)

## Experimental section

### Materials.

Monomers **1**,<sup>1</sup> **2a**,<sup>2</sup> and **2b**<sup>3</sup> were prepared according to the literatures. Dichloro(*p*-cymene)ruthenium(II) dimer ([RuCl<sub>2</sub>(*p*-cymene)]<sub>2</sub>; Sigma-Aldrich), CaH<sub>2</sub> (Nacalai Tesque, >99.0%), MgSO<sub>4</sub> (FUJIFILM Wako Pure Chemical, >98.0%) were used as received. 1,2-dichloroethane (FUJIFILM Wako Pure Chemical, Guaranteed Reagent) were dried over CaH<sub>2</sub> and used without further purification.

### Polymer Synthesis.

**P3-CN** (polymerization of **1** with **2b**). Under a N<sub>2</sub> atmosphere, a 1,2-dichloroethane solution (0.85 mL) of **1** (60.5 mg, 0.200 mmol) and **2b** (60.1 mg, 0.200 mmol) were placed in a Schlenk tube. At room temperature, a 1,2-dichloroethane solution (0.4 mL) of [RuCl<sub>2</sub>(*p*-cymene)]<sub>2</sub> [3.1 mg, 0.0050 mmol (0.010 mmol of Ru)] was added to the solution, and the mixture was stirred at 30 °C for 12 h. Then, CHCl<sub>3</sub> (15 mL) was added, and the resulting mixture was transferred to a separatory funnel, where the organic layer was washed with water (15 mL) and brine (15 mL). The organic layer was dried over MgSO<sub>4</sub>, and the volatiles were removed under reduced pressure. The residual crude product was subjected to purification with preparative recycling SEC using CHCl<sub>3</sub> as an eluent to afford **P3-CN** (49 mg, 43%).

<sup>1</sup>H NMR (500 MHz, CDCl<sub>3</sub>, δ): 7.47 [s, 4*n*H, Ar-*H* (derived from **1**)], 7.2 [br, 2*n*H, Ar-*H* (derived from **2b**)], 6.9 [br, 4*n*H, Ar-*H* (derived from **2b**)], 6.7 [br, 2*n*H, Ar-*H* (derived from **2b**)], 6.5 [br, 4*n*H, Ar-*H* (derived from **2b**)], 5.00 (s, 2*n*H, CH), 4.9 (br, 2*n*H, NH), 4.0–4.3 (m, 4*n*H, OCH<sub>2</sub>), 1.2 (m, 6*n*H, CH<sub>3</sub>).

<sup>13</sup>C NMR (126 MHz, CDCl<sub>3</sub>, δ): 171.5 (C=O), 152.5 [Ar, quaternary (q.)], 144.0 (Ar, q.), 137.8 (Ar, q.), 136.3 (Ar, q.), 133.0 [Ar (C-H)], 128.0 [Ar (C-H)], 127.7 [Ar (C-H)], 120.4 (CN), 116.3 [Ar (C-H)], 114.3 [Ar (C-H)], 99.6 (Ar, q.), 62.0 (OCH<sub>2</sub>), 60.8 (CH-NH), 14.1 (CH<sub>3</sub>).

Anal. Calcd for [C<sub>33</sub>H<sub>30</sub>N<sub>4</sub>O<sub>4</sub> · H<sub>2</sub>O]<sub>*n*</sub>: C, 70.20; H, 5.71; N, 9.92. Found: C, 70.56; H, 6.30; N, 8.92.

**P3-OMe** was prepared in a similar manner by the polymerization of **1** with **2a**.

<sup>1</sup>H NMR (500 MHz, CDCl<sub>3</sub>, δ): 7.45 [s, 4*n*H, Ar-*H* (derived from **1**)], 6.9–6.7 [m, 2*n*H × 2 + 4*n*H, Ar-*H* (derived from **2a**)], 6.4 [br, 4*n*H, Ar-*H* (derived from **2a**)], 5.0 (br, 2*n*H, CH), 4.2–4.1 (m, 4*n*H, OCH<sub>2</sub>), 3.71 (s, 3*n*H, OCH<sub>3</sub>), 1.2–1.1 (m, 6*n*H, CH<sub>3</sub>).

<sup>13</sup>C NMR (126 MHz, CDCl<sub>3</sub>, δ): 171.1 (C=O), 150–110 (Ar), 61.8 (OCH<sub>2</sub>), 60.9 (CH-NH), 55.5 (OCH<sub>3</sub>), 14.1 (CH<sub>3</sub>). Because of the very broad appearance and overlapping, the signals for aromatic carbons of **P3-OMe** cannot be precisely assigned.

Anal. Calcd for [C<sub>33</sub>H<sub>33</sub>N<sub>3</sub>O<sub>5</sub>]<sub>*n*</sub>: C, 71.85; H, 6.03; N, 7.62. Found: C, 71.05; H, 6.14; N, 7.30.

### Fabrication of the Electrochromic Films and Devices

For polymer films in the electrochemical measurements, 10 mg polymer samples were first dissolved into 5 mL DMAc. After the samples dissolved, the polymer solution was filtered through 0.22 μm PTFE filters and dropped onto the indium-tin-oxide (ITO)-coated glasses (6 mm × 30 mm). The specimen was dried under vacuum at room temperature until most of the solvent was removed and then heated at 80 °C for 4 hours and 160 °C for 8 hours.

As for devices, the polyamine was drop-coated onto ITO-coated glass substrates (25 mm × 30 mm). Then, confined the gap to 120 μm between two pieces of ITO-coated glass substrates by using a full-auto dispenser to coat thermoset adhesive with a 20 × 20 mm<sup>2</sup> active area under 120 °C for 6 hours and retained a tiny hole to inject gel solution into the device using vacuum encapsulating method. After injection of gel electrolytes, sealed the tiny hole with UV-curing adhesive, and the device would cure under 75 °C for 2 hours. The polymer gel was made of 7.6 mg of poly(MMA-HEMA), 1.65 mg (0.1 M) of tetrabutylammonium tetrafluoroborate (TBABF<sub>4</sub>), 0.40 mg (0.015 M) of HV, 0.63 mg of aliphatic polyisocyanate (Desmodur® N3200), 0.01 mg of catalyst dibutyltin diacetate, and 0.048 mL of propylene carbonate (PC).

### Measurements.

The polymers' molar mass distributions were measured via SEC in THF at 40 °C on polystyrene gel columns (Waters Styragel HR4 and HR2 with molar-mass exclusion limit = 600 kDa and 20 kDa for polystyrene, respectively; column size = 300 mm × 7.8 mm i.d.; average particle size = 5 μm, flow rate = 1.0 mL/min) connected to a pump (JASCO, PU-4180), a column oven (JASCO, CO-2065 Plus), an ultraviolet detector (JASCO, UV-4075), and a refractive index detector (JASCO, RI-2031 Plus). The number-average molar mass ( $M_n$ ) and dispersity [ $D$ ; weight-average molar mass/number-average molar mass ( $M_w/M_n$ )] were calculated from the chromatographs based on six poly(methyl methacrylate) (PMMA) standards (Shodex M-75;  $M_p$  = 2400–212000,  $D < 1.1$ ) and dibutyl sebacate (molar mass = 314.5). Purification by preparative recycling SEC was performed on a JAI LC-918R equipped with a combination of JAIGEL-3H and JAIGEL-2H (Japan Analytical Industry; molar mass exclusion limit = 70 kDa and 5 kDa for polystyrene, respectively; column size = 600 mm × 20 mm i.d.) using chloroform as eluent at a flow rate of 3.8 mL/min at room temperature.

<sup>1</sup>H (500 MHz) and <sup>13</sup>C (126 MHz) NMR spectra were recorded on a Bruker Avance III HD 500 spectrometer in CDCl<sub>3</sub> at room temperature or at 50 °C.

FT-IR spectra were recorded on Perkin-Elmer Spectrum Two system using KBr pellets.

Elemental analyses were performed on a YANAKO CHN Corder MT-5.

The glass transition temperature ( $T_g$ ) of polymers was determined by differential scanning calorimetry (DSC; Seiko Instruments Inc., EXSTAR DSC6000) in the range from −100 °C to 200 °C for product polymers. The heating and cooling rates were 10 °C/min. The  $T_g$  of the polymers was defined as the temperature of the midpoint of a heat capacity change on the second heating scan. Thermogravimetric analysis was performed with Exstar TG/DTA6200 (Seiko Instruments). The experiments were carried out with about 5 mg of a sample under a nitrogen atmosphere at a heating rate of 10 °C/min.

Electrochemical properties, including cyclic voltammetry (CV) and differential pulse voltammograms (DPV), were conducted through CH Instruments 6122E Electrochemical Analyzer under a three-electrode system consisting of polymer film coated on a 6 mm by 30 mm ITO glass as a working electrode, a platinum counter electrode, and an Ag/AgCl reference electrode in 3 mL PC with 0.1 M TBABF<sub>4</sub> as supporting electrolyte. An Ailgent UV-vis spectrophotometer recorded the spectroelectrochemical spectra.

## Supplementary Figures

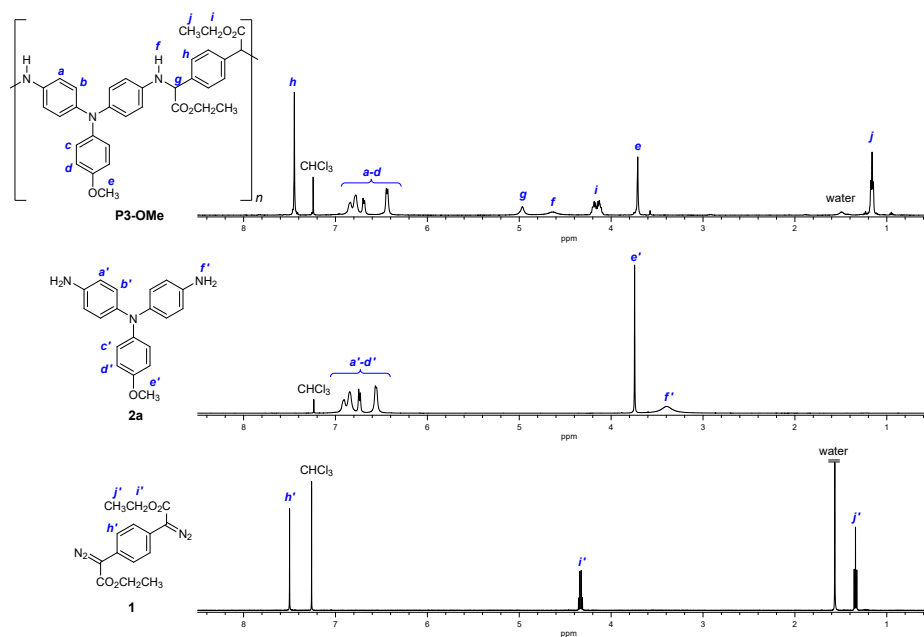

**Figure S1.**  $^1\text{H}$  NMR spectra of **P3-OMe** ( $M_n = 7700$ ,  $D = 1.44$ ), **2a**, and **1**.

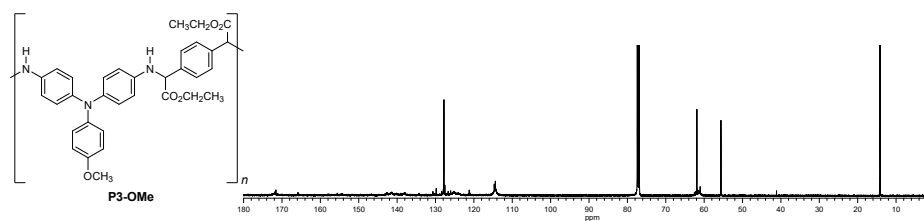

**Figure S2.**  $^{13}\text{C}$  NMR spectra of **P3-OMe** ( $M_n = 4000$ ,  $D = 2.10$ ).

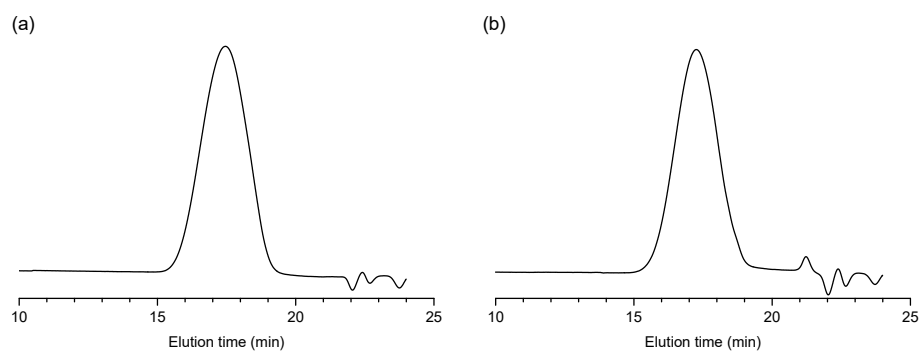

**Figure S3.** SEC charts of (a) **P3-OMe** ( $M_n = 7700$ ,  $D = 1.44$ ) and (b) **P3-CN** ( $M_n = 8700$ ,  $D = 1.40$ ).

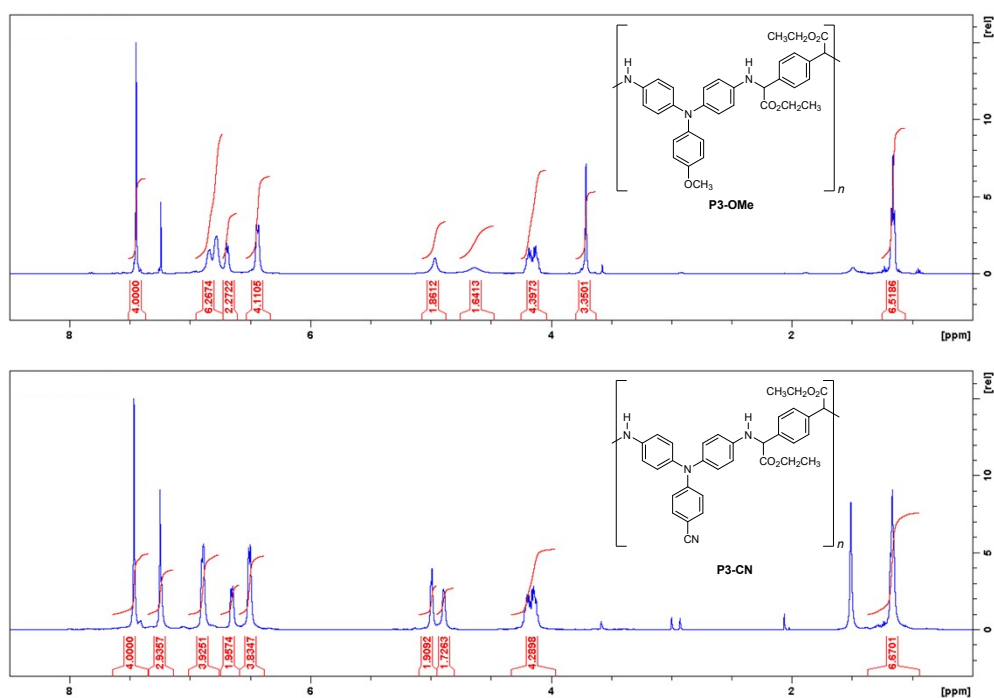

**Figure S4.**  $^1\text{H}$  NMR spectra of **P3-OMe** (upper;  $M_n = 14000$ ,  $D = 1.42$ ) and **P3-CN** (lower;  $M_n = 7700$ ,  $D = 1.44$ ) with the intensities of signals.

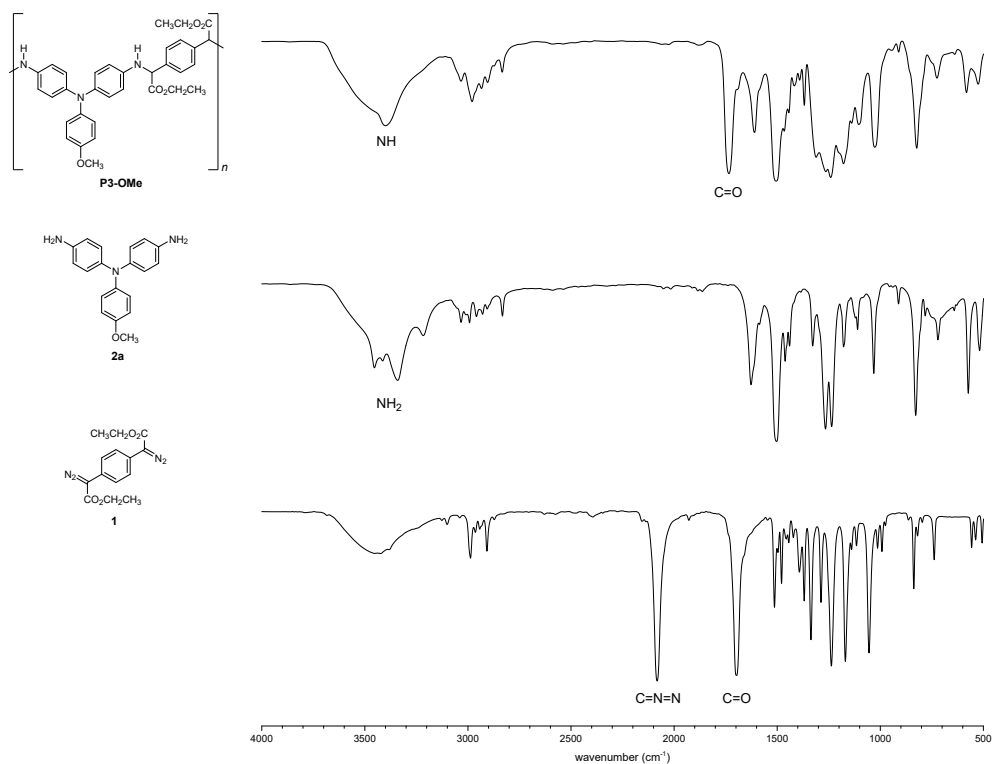

**Figure S5.** FT-IR spectra of **P3-OMe** ( $M_n = 7700$ ,  $D = 1.44$ ), **2a**, and **1**.

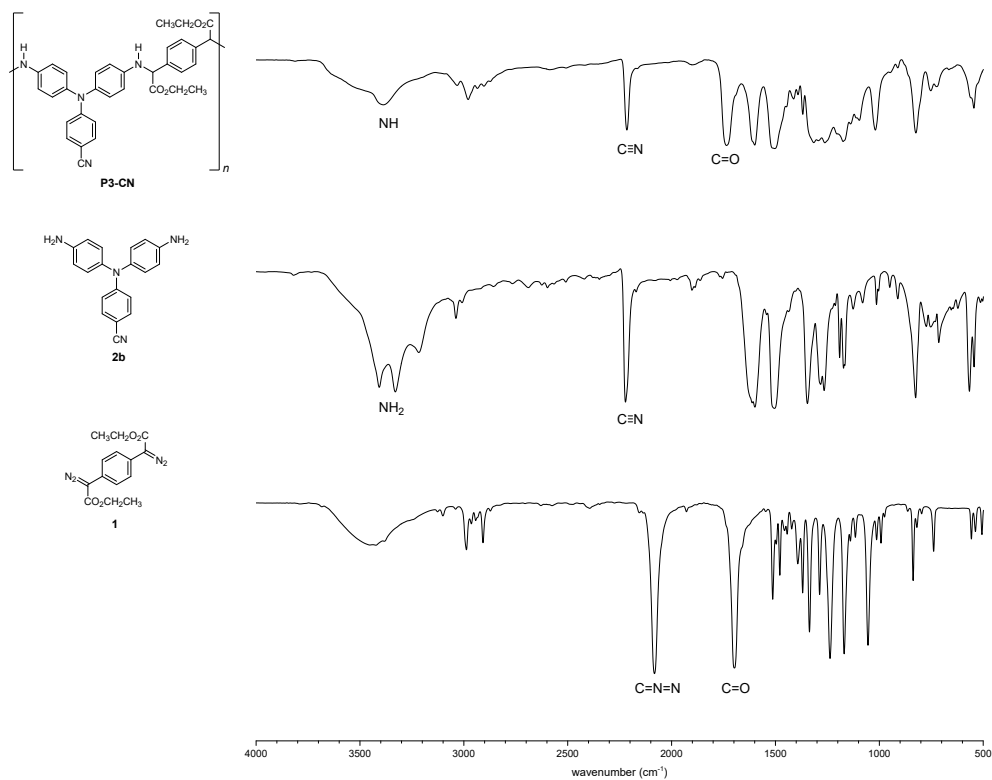

**Figure S6.** FT-IR spectra of **P3-CN** ( $M_n = 14000$ ,  $D = 1.42$ ), **2b**, and **1**.

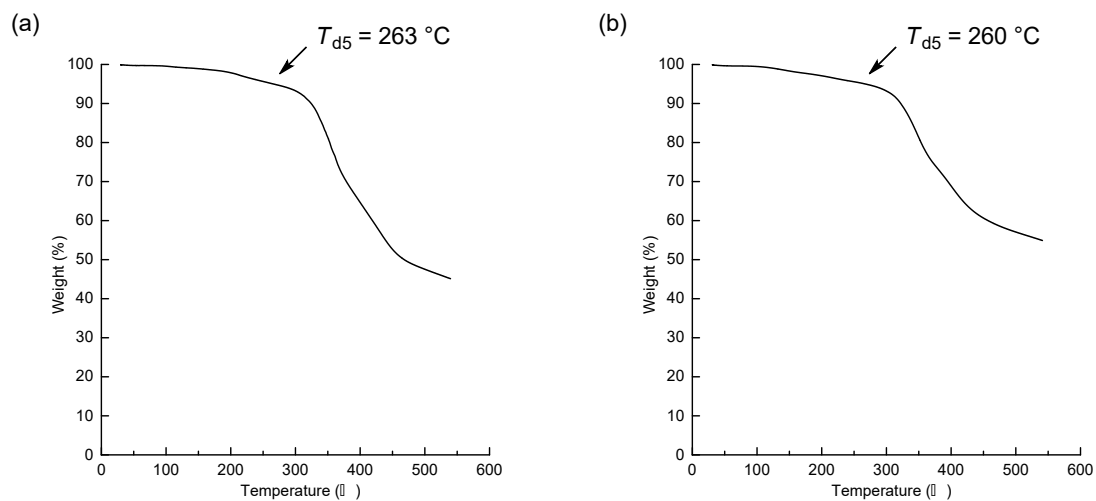

**Figure S7.** Thermogravimetric analysis results of (a) **P3-OMe** ( $M_n = 7100$ ,  $D = 1.64$ ) and (b) **P3-CN** ( $M_n = 9800$ ,  $D = 1.40$ ).

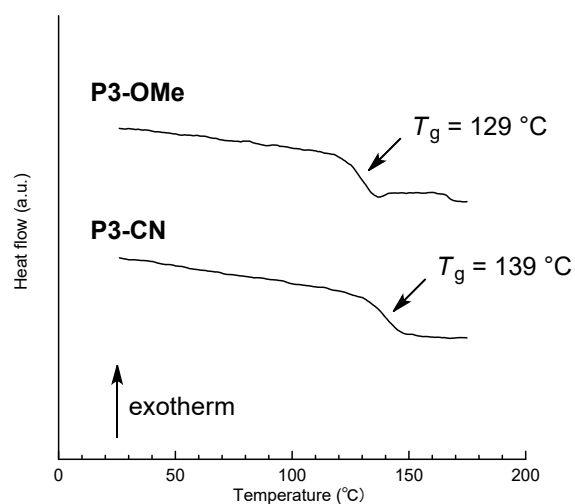

**Figure S8.** DSC thermograms of **P3-OMe** ( $M_n = 7100$ ,  $D = 1.64$ ) and **P3-CN** ( $M_n = 9800$ ,  $D = 1.40$ ).

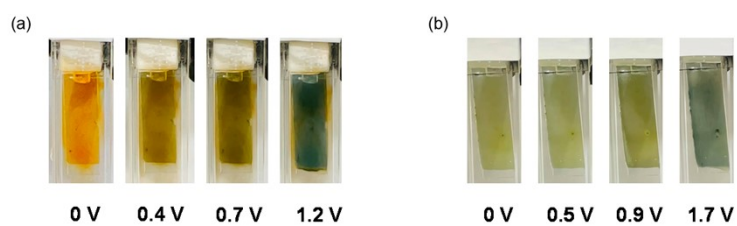

**Figure S9.** Photographs of (a) **P3-OMe** (thickness:  $500 \pm 10$  nm) and (b) **P3-CN** (thickness:  $500 \pm 40$  nm) in TBABF<sub>4</sub>/PC at the neutral state and three oxidation states.

## References

1. H. Shimomoto, H. Mukai, H. Bekku, T. Itoh and E. Ihara, *Macromolecules*, 2017, **50**, 9233–9238.
2. C.-W. Chang, G.-S. Liou and S.-H. Hsiao, *J. Mater. Chem.*, 2007, **17**, 1007–1015.
3. H.-J. Yen, C.-J. Chen and G.-S. Liou, *Chem. Comm.*, 2013, **49**, 630–632.
